# Supplementary material for: In Vitro Bioaccessibility of Bioactive Compounds from Citrus Pomaces and Orange Pomace Biscuits
Source: MDPI journal article supplement (doi:10.3390/molecules26123480), 2021-06-08
Supplement: s1 [file s1]

Supplementary material

Negative MS quantitation channels

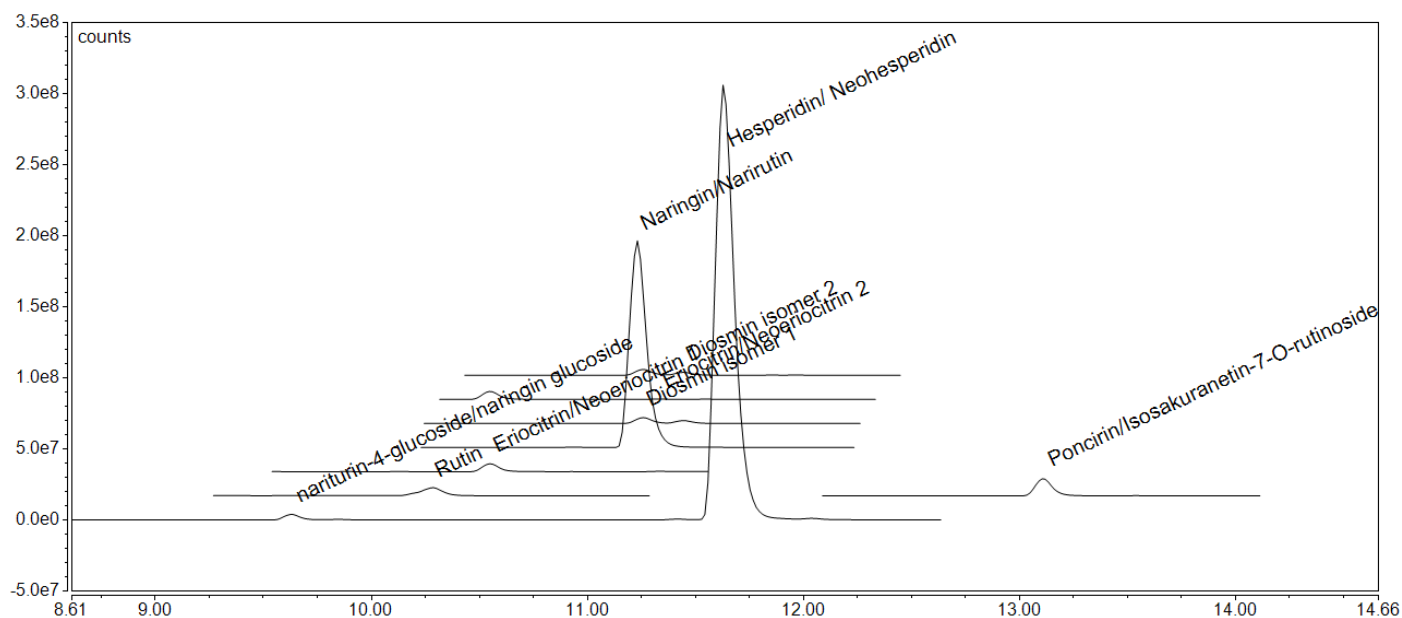

Positive MS quantitation channels

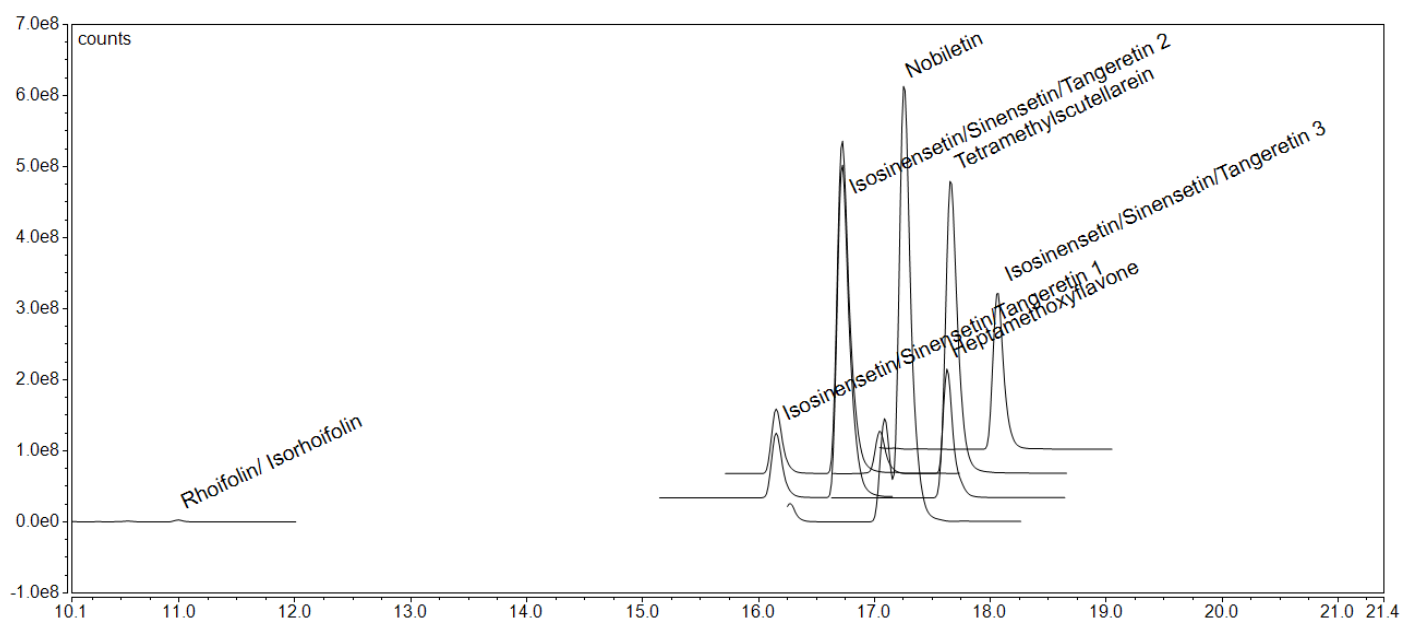

**Figure S1.** Representative extracted ion chromatograms (EICs) for both positive and negative electrospray ionization

**Table S1.** Proximate analysis of raw citrus pomaces powders after drying and milling.

| Components    | Clemenule<br>Mandarin | Ortanique<br>Mandarin | Navel<br>Orange | Valencia<br>Orange |
|---------------|-----------------------|-----------------------|-----------------|--------------------|
| Lipids        | 0.79                  | 1.41                  | 0.85            | 1.18               |
| Carbohydrates | 84.77                 | 80.73                 | 83.16           | 83.62              |
| Sugars        | 41.06                 | 42.14                 | 47.96           | 31.91              |
| Fiber         | 43.71                 | 38.59                 | 35.20           | 51.71              |
| Proteins      | 5.63                  | 6.64                  | 5.09            | 4.89               |
| Ashes         | 3.10                  | 3.22                  | 2.69            | 2.99               |

Results are expressed as mean values as g/100 g of dry pomace powder.
